# Supplementary material
Source: PubMed Central journal article supplement (PMC3711865)

## Supplementary Material

### Single-step Fabrication of Patterned Gold Film Array by Engineered Multi-functional Peptide

Marketa Hnilova, Dmitriy Khatayevich, Alisa Carlson, Ersin Emre Oren, Carolyn Gresswell, Sam Zheng, Fumio Ohuchi, Mehmet Sarikaya and Candan Tamerler\*

*Peptide Synthesis:* Multi-functional peptides QBP-AuBP, AuBP-QBP, QBP and AuBP sequences were synthesized on Wang resin *via* automated Fmoc peptide synthesis and HBTU activation using CSBio 336s peptide synthesizer (CSBio Inc, USA). The synthesized resin-bound peptides were cleaved and side deprotected by Reagent K (TFA/thioanisole/H<sub>2</sub>O, phenol/ethanedithiol – 82.5:5:5:5:2.5) and then precipitated in cold ether. The obtained crude peptides were then purified by reversed-phase high-performance liquid chromatography (HPLC system, Waters, USA) using Gemini column (10 μm C18 110A) (AnalSpec, USA). The mass of purified peptides were checked by mass spectroscopy using matrix-assisted laser desorption/ionization (MALDI) mass spectrometer with time-of-flight detector (TOF).

**Figure S1. Peptide Synthesis and Characterization.** Table of synthesized peptide sequences and their respective molecular weights (a), MALDI-TOF MS spectrums of synthesized and HPLC purified peptide sequences (b).

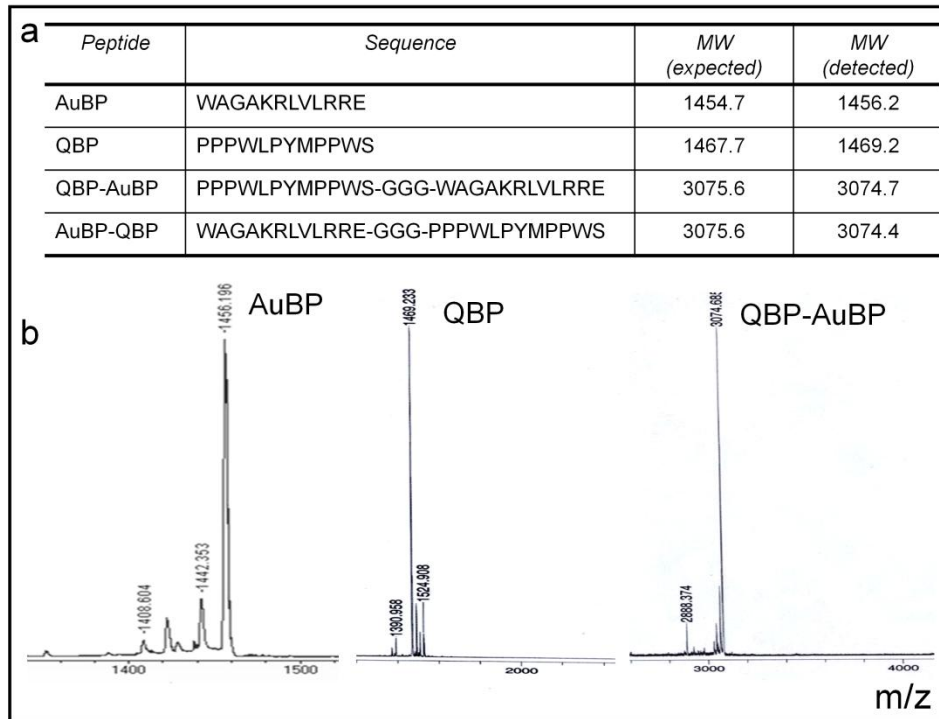

**Figure S2. Production of Gold Nanoparticle Arrays via Peptide-mediated Immobilization.**

Schematic of peptide-mediated immobilization of Au NP array (a), dark field images of gold nanoparticle arrays (b), respective images from atomic force microscopy along with height profiles (c).

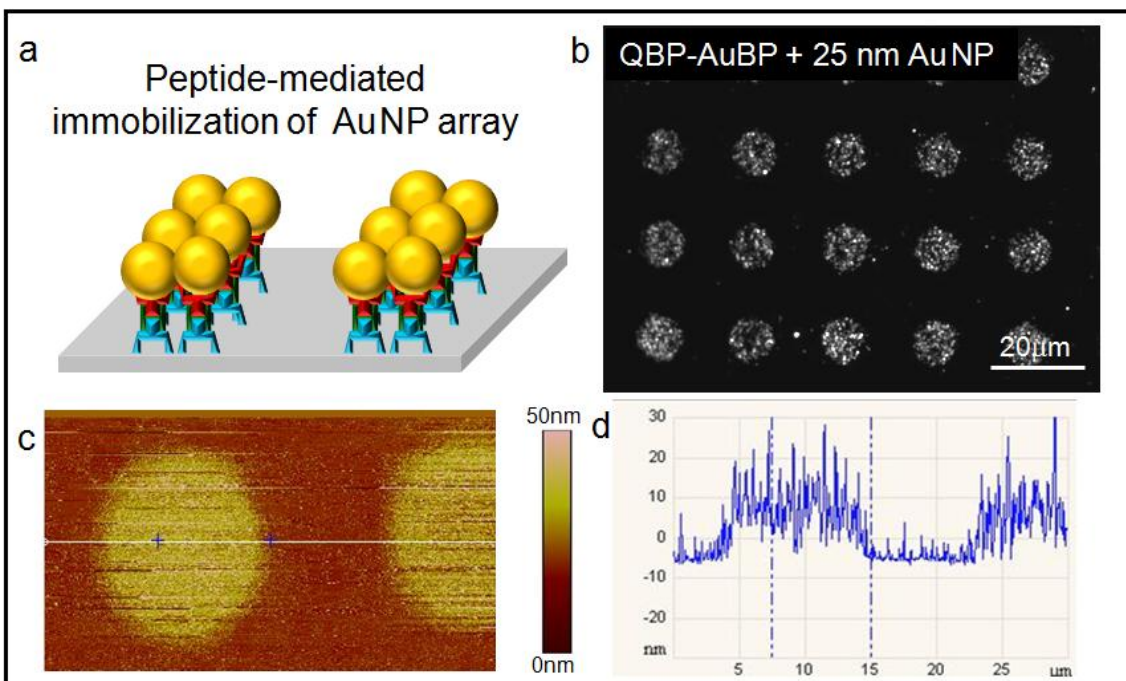

### Figure S3. Fabrication of Gold Nanoparticle Film Arrays *via* Peptide-mediated Gold

**Formation.** Atomic force microscopy images along with height profiles of formed gold film *via* peptide-mediated gold formation at different zooms (a-b).

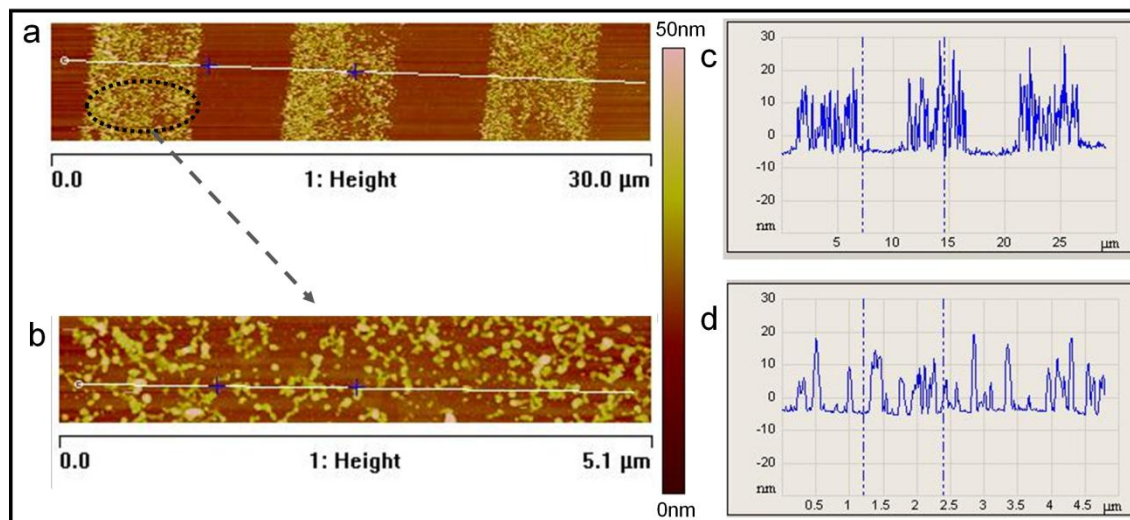

**Figure S4. Fabrication of Gold Film Arrays *via* Peptide-mediated Gold Formation.** Atomic force microscopy images along with height profiles of control experiment (no peptide printed) at different zooms (a-b).

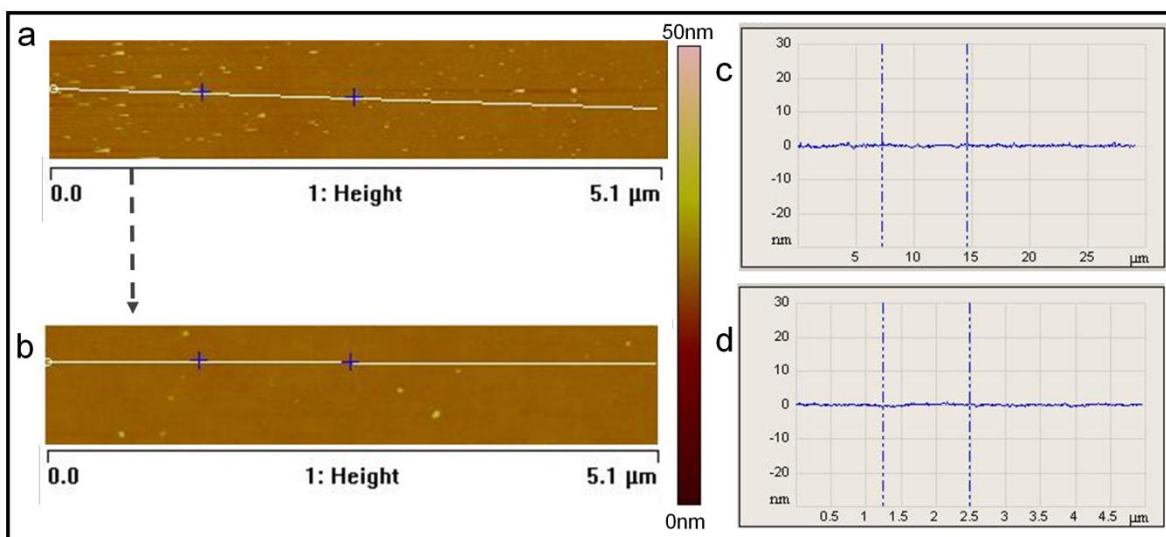

**Figure S5. Fabrication of Gold Film Arrays *via* Peptide-mediated Gold Formation.** X-ray photoelectron spectroscopy Au4f (a) and C1s (b) scans obtained from gold nanoparticle film formed *via* peptide-mediated gold formation (blue) and from control samples with no peptide present (red).

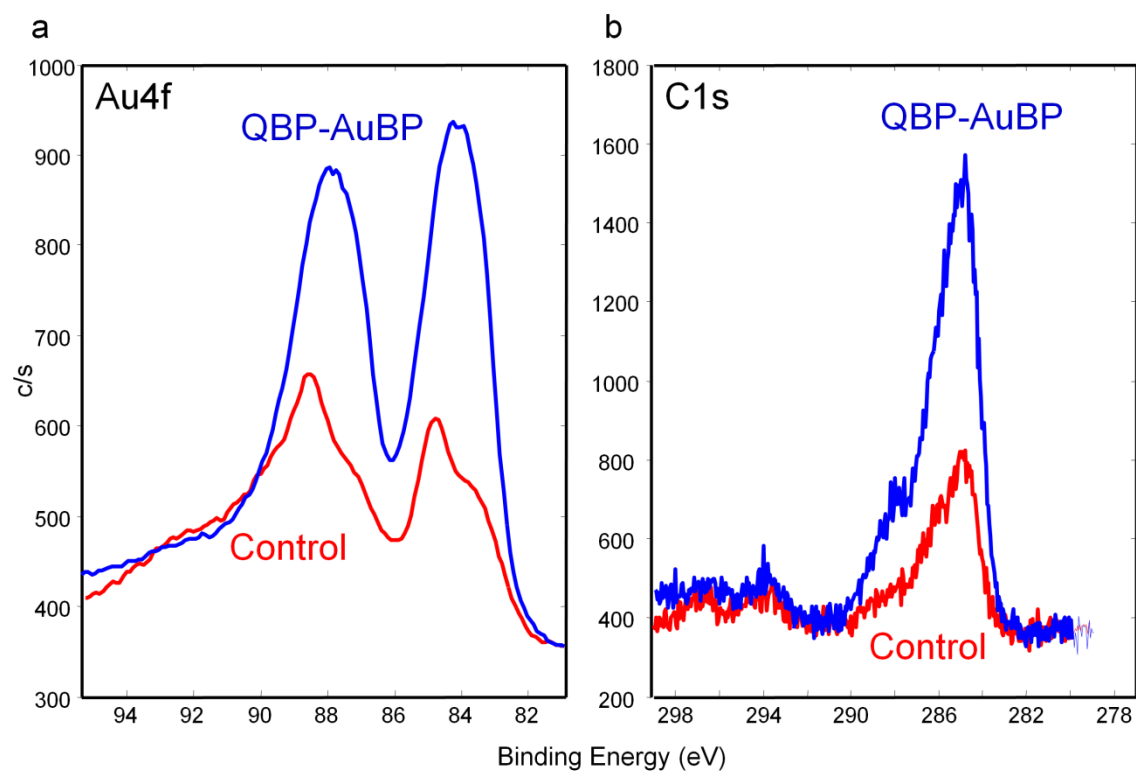

**Figure S6. Fabrication of Gold Film Arrays *via* Peptide-mediated Gold Formation.**

Scanning electron microscopy images of produced gold nanoparticle film on silica surface *via* peptide-mediated gold formation at different zooms (a-d), sample surface was prior to SEM coated with thin layer of Pt.

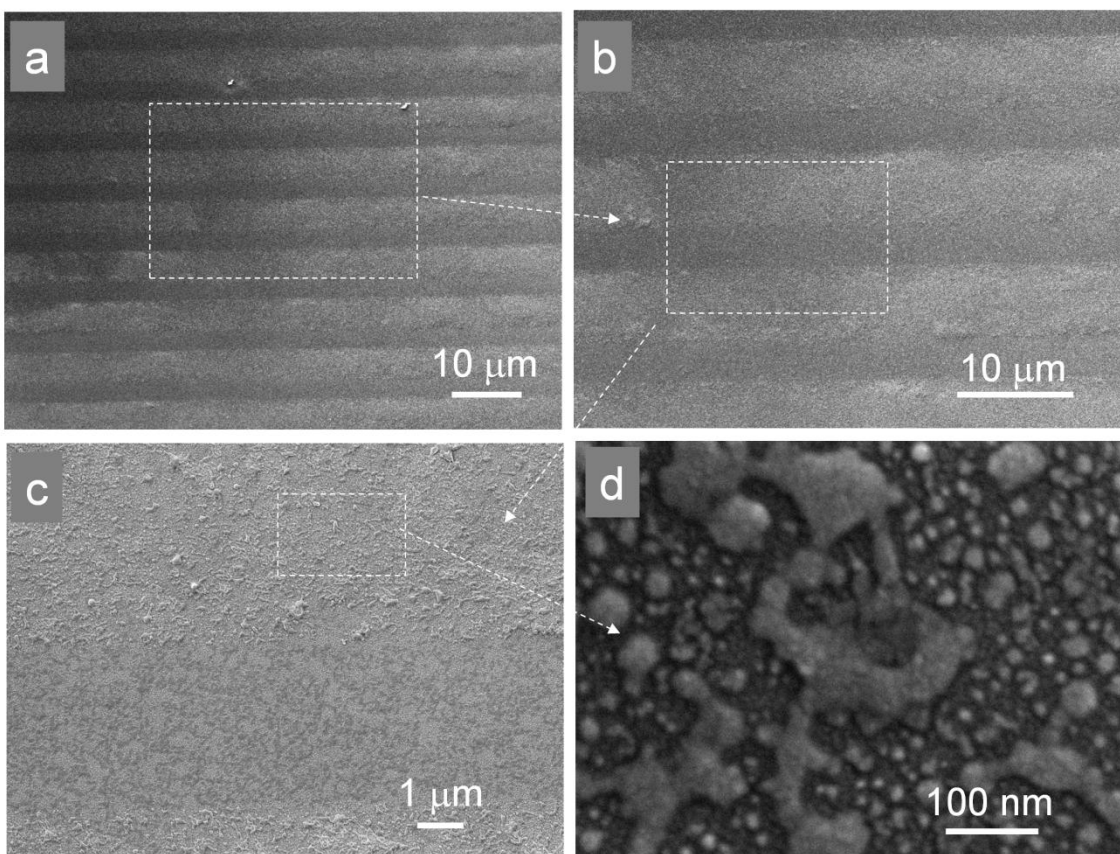

Supplement: NIHMS383980-supplement-SD.pdf [file NIHMS383980-supplement-SD.pdf]
